# Supplementary material for: Tunable Schottky contacts in graphene/XAu4Y (X, Y = Se, Te) heterostructures
Source: Royal Society of Chemistry journal article supplement (doi:10.1039/d2cp05458b), 2023-01-01
Supplement: d2cp05458b1.pdf [file d2cp05458b1.pdf]

## Supplementary material

### **Tunable Schottky contacts in graphene/XAu<sub>4</sub>Y (X, Y = Se, Te) heterostructures**

Yufei Xue<sup>†,#</sup>, Lei Gao<sup>†,‡,#,\*</sup>, Weina Ren<sup>†</sup>, Xuxia Shai<sup>†</sup>, Tingting Wei<sup>†</sup>, Chunhua Zeng<sup>†,\*</sup>, Hua Wang<sup>‡,\*</sup>

<sup>†</sup> Institute of Physical and Engineering Science/Faculty of Science, Kunming University of Science and Technology, Kunming 650500, Yunnan, China

<sup>‡</sup> State Key Laboratory of Complex Nonferrous Metal Resources Clean Utilization, Kunming University of Science and Technology, Kunming 650093, Yunnan, China

<sup>#</sup> These authors contributed equally.

<sup>\*</sup> Corresponding author.

E-mail: lgao@kust.edu.cn (Lei Gao); chzeng83@kust.edu.cn (Chunhua Zeng); wanghua65@163.com (Hua Wang)

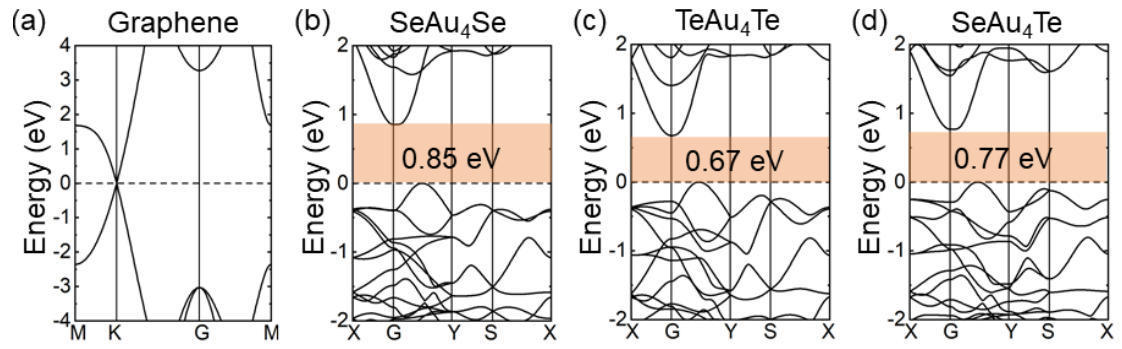

**Figure S1** Energy band structures of (a) graphene, (b)  $\text{SeAu}_4\text{Se}$ , (c)  $\text{TeAu}_4\text{Te}$  and (d)  $\text{SeAu}_4\text{Te}$  monolayers, respectively.

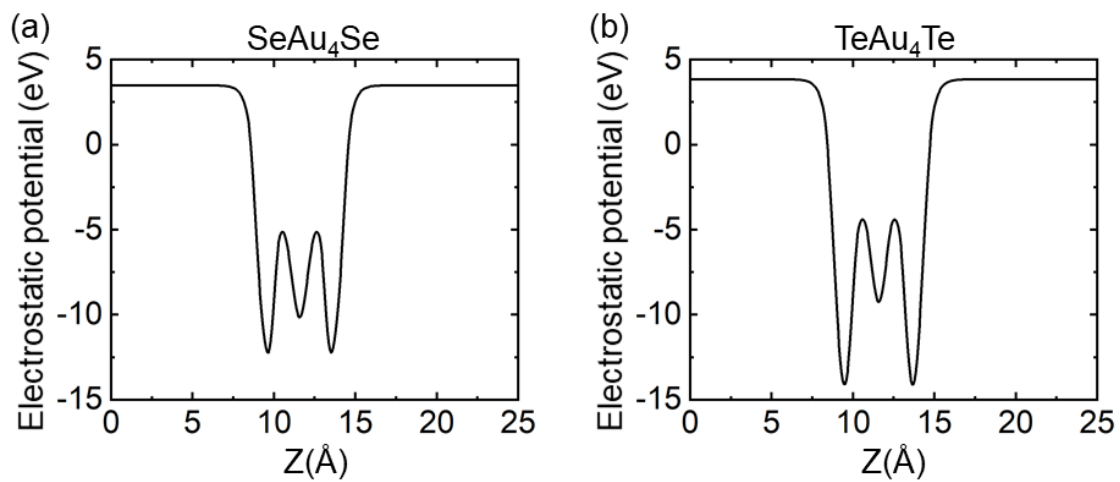

**Figure S2** Electrostatic potentials of (a) SeAu<sub>4</sub>Se and (b) TeAu<sub>4</sub>Te monolayers, respectively.

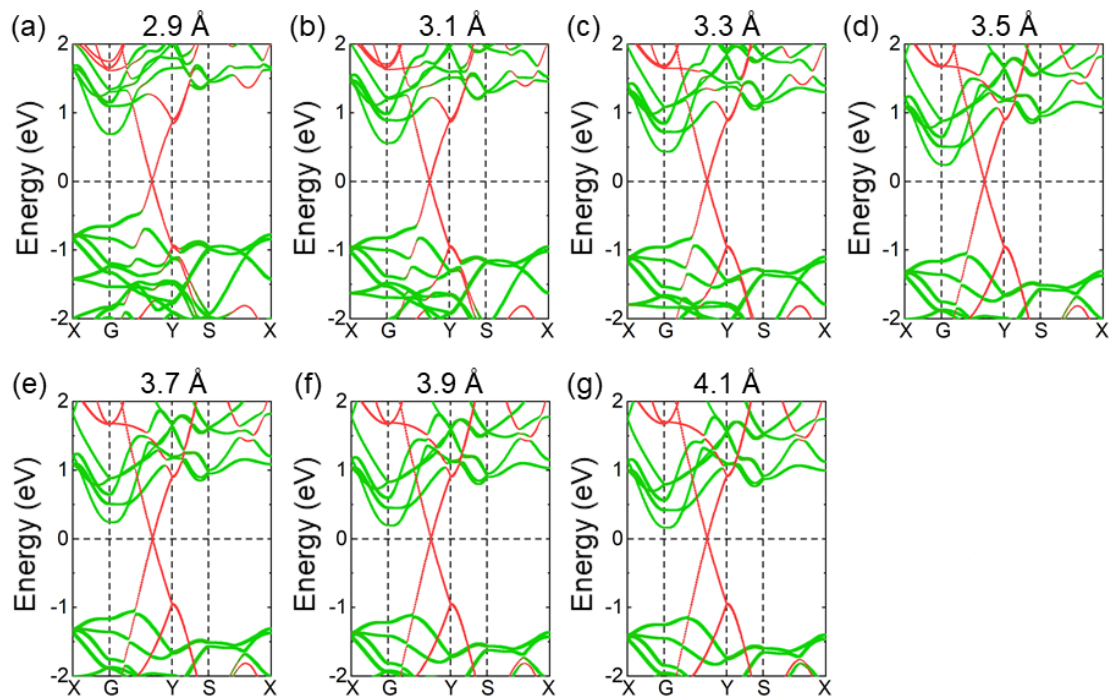

**Figure S3** (a)-(g) Projected band structures of G/SeAu<sub>4</sub>Se heterostructure with different interlayer distances. The contributions of G and SeAu<sub>4</sub>Se monolayers are marked by red and green, respectively.

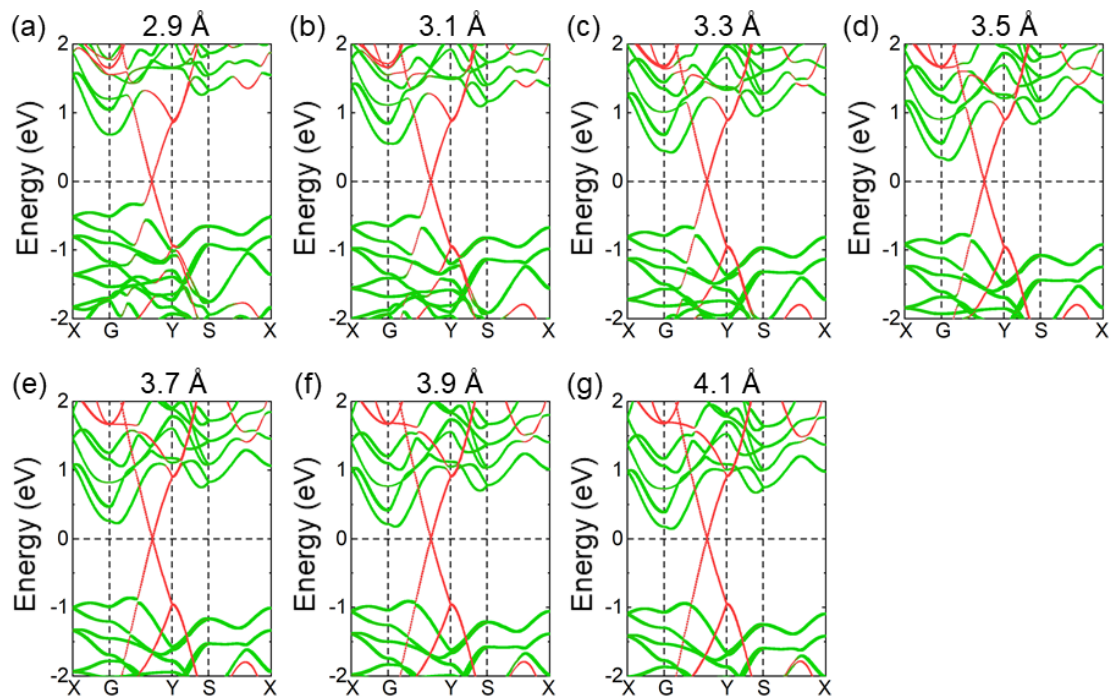

**Figure S4** (a)-(g) Projected band structures of G/SeAu<sub>4</sub>Te heterostructure with different interlayer distances. The contributions of G and SeAu<sub>4</sub>Te monolayers are marked by red and green, respectively.

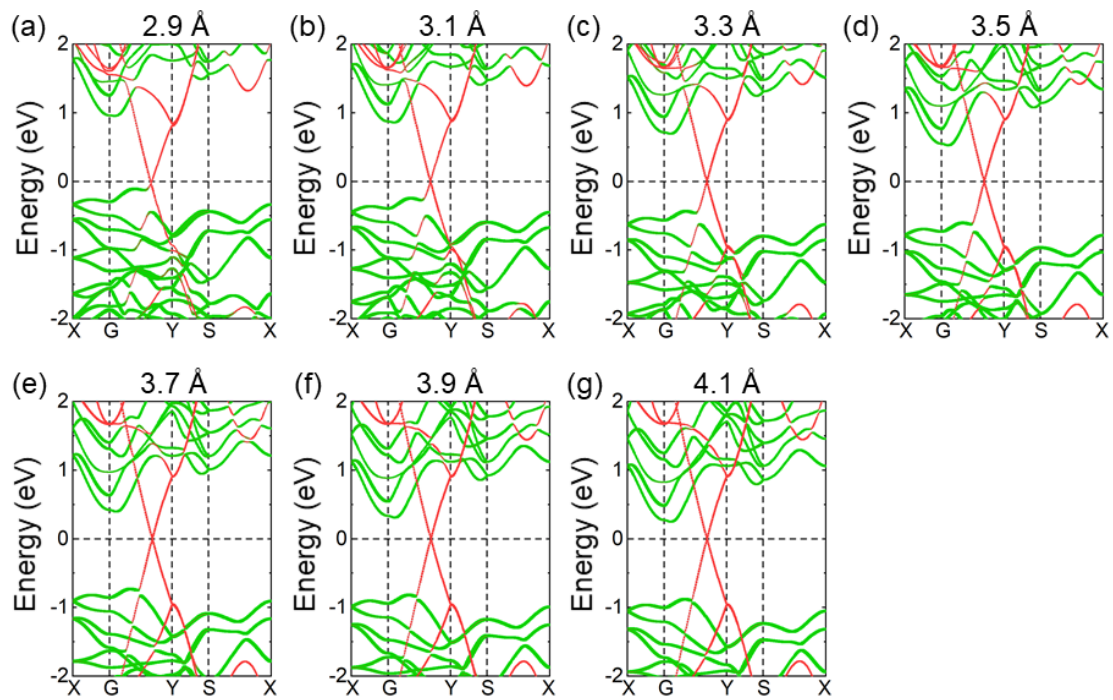

**Figure S5** (a)-(g) Projected band structures of G/TeAu<sub>4</sub>Se heterostructure with different interlayer distances. The contributions of G and TeAu<sub>4</sub>Se monolayers are marked by red and green, respectively.

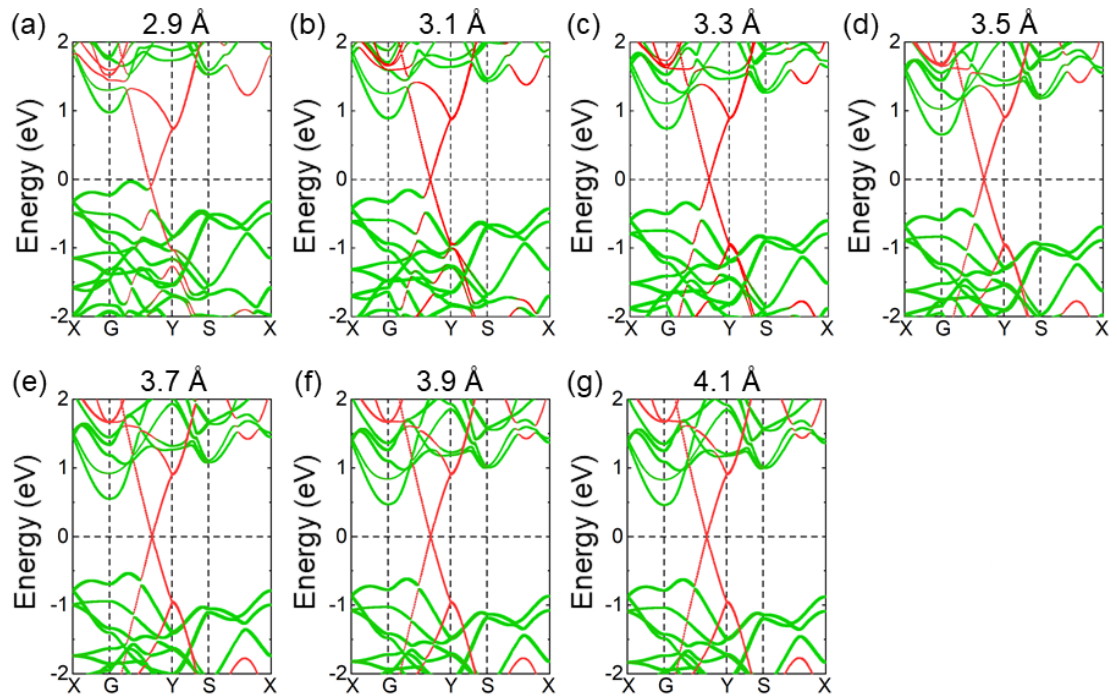

**Figure S6** (a)-(g) Projected band structures of G/TeAu<sub>4</sub>Te heterostructures with different interlayer distances. The contributions of G and TeAu<sub>4</sub>Te monolayers are marked by red and green, respectively.

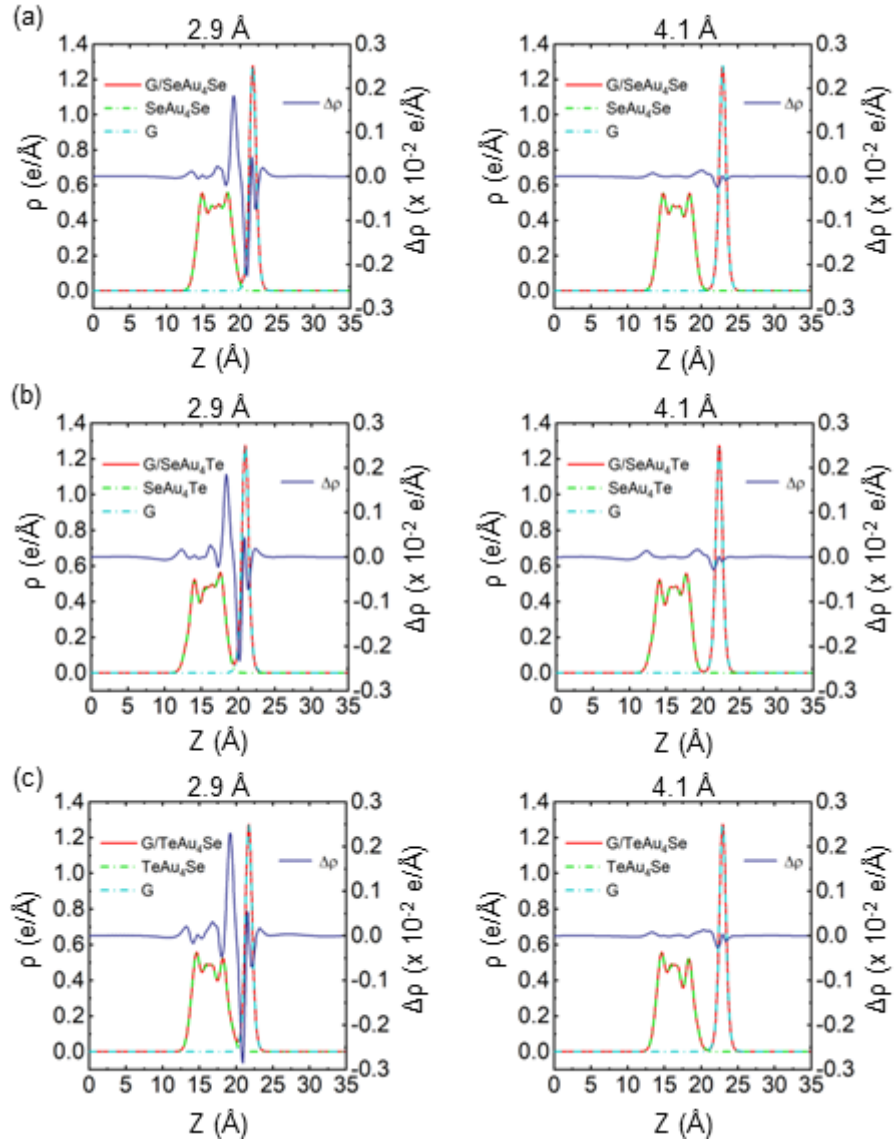

**Figure S7** Charge density differences of (a) G/SeAu<sub>4</sub>Se, (b) G/SeAu<sub>4</sub>Te and (c) G/TeAu<sub>4</sub>Se heterostructures with interlayer distances of 2.9 and 4.1 Å. The charge density difference of heterostructures is denoted by blue solid line. The charge densities of G/XAu<sub>4</sub>Y, G and XAu<sub>4</sub>Y are denoted by red solid lines, cyan and green dotted lines, respectively.



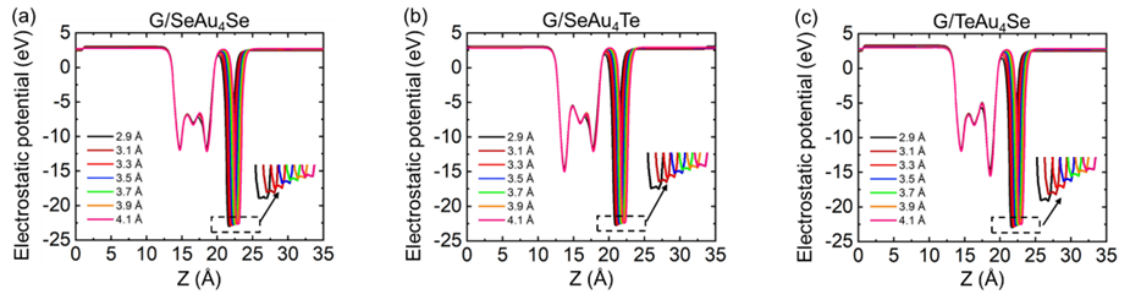

**Figure S8** Electrostatic potentials of (a) G/SeAu<sub>4</sub>Se, (b) G/SeAu<sub>4</sub>Te and (c) G/TeAu<sub>4</sub>Se heterostructures with interlayer distances from 2.9 to 4.1 Å. With the interlayer distance decreasing, the amount of transferred electrons increases, and meanwhile, the potential well of G notably becomes deeper, leading to a stronger interfacial electrostatic field.

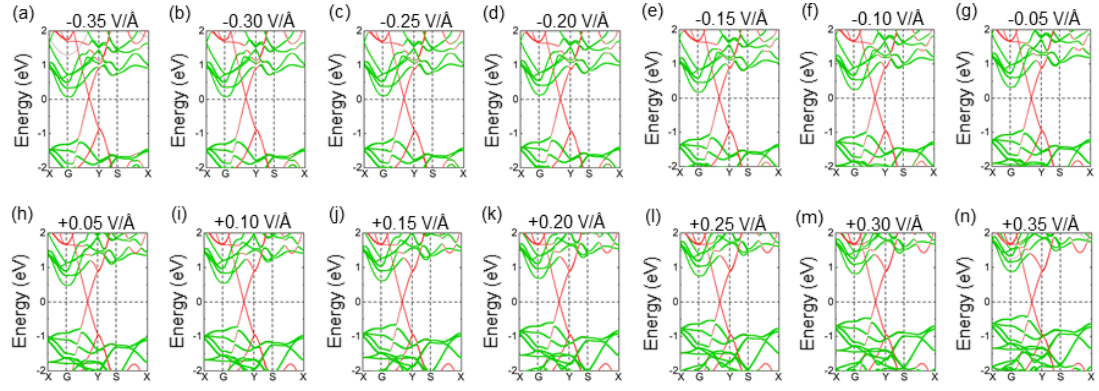

**Figure S9** (a)-(n) Projected band structures of G/SeAu<sub>4</sub>Se heterostructures with -0.35 to +0.35 V/Å electric fields. The contributions of G and SeAu<sub>4</sub>Se monolayers are marked by red and green, respectively.

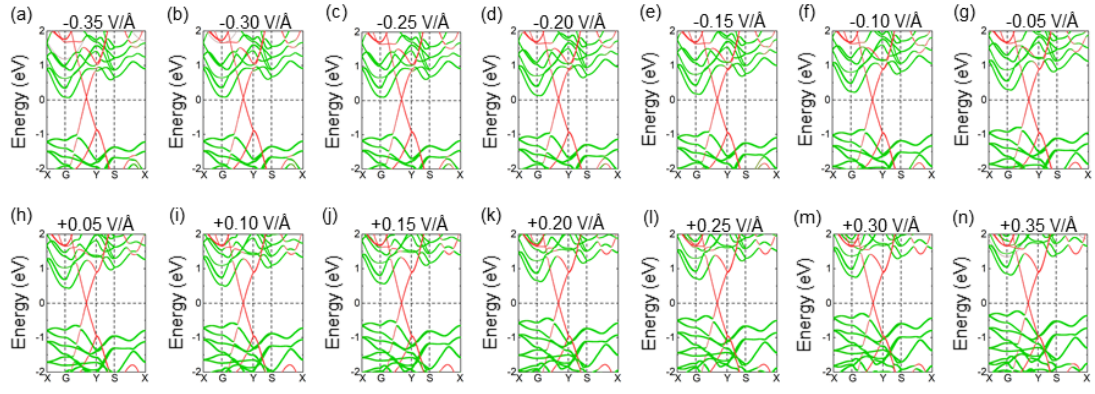

**Figure S10** (a)-(n) Projected band structures of G/SeAu<sub>4</sub>Te heterostructures with -0.35 to +0.35 V/Å electric fields. The contributions of G and SeAu<sub>4</sub>Te monolayers are marked by red and green, respectively.

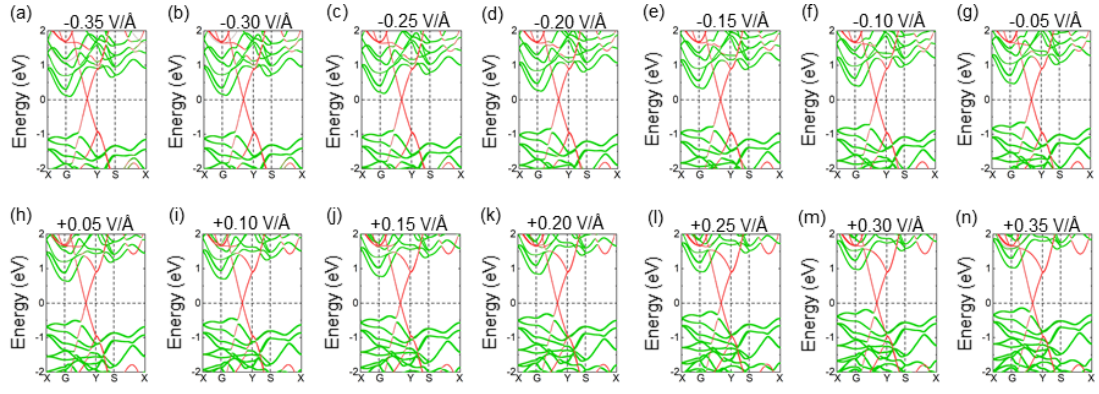

**Figure S11** (a)-(n) Projected band structures of G/TeAu<sub>4</sub>Se heterostructures with -0.35 to +0.35 V/Å electric fields. The contributions of G and TeAu<sub>4</sub>Se monolayers are marked by red and green, respectively.

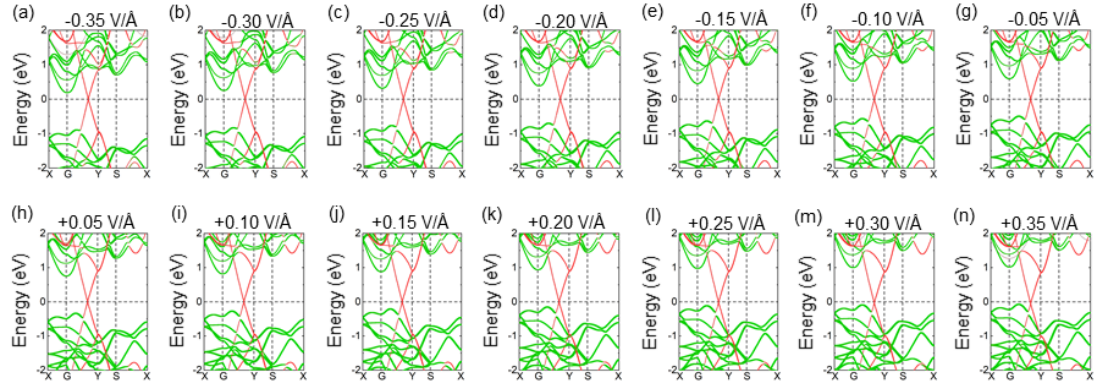

**Figure S12** (a)-(n) Projected band structures of G/TeAu<sub>4</sub>Te heterostructures with -0.35 to +0.35 V/Å electric fields. The contributions of G and TeAu<sub>4</sub>Te monolayers are marked by red and green, respectively.

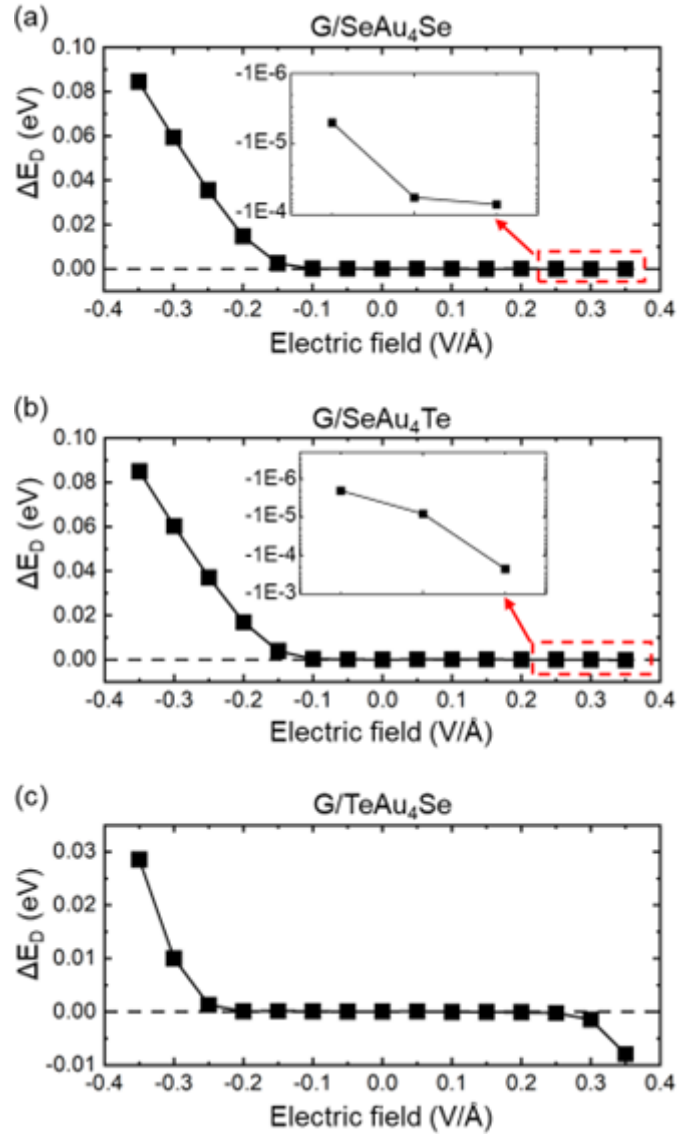

**Figure S13** Energy shift of graphene's Dirac cone with respect to the Fermi level for (a) G/SeAu<sub>4</sub>Se, (b) G/SeAu<sub>4</sub>Te and (c) G/TeAu<sub>4</sub>Se as a function of electric field from -0.35 to +0.35 V/Å.

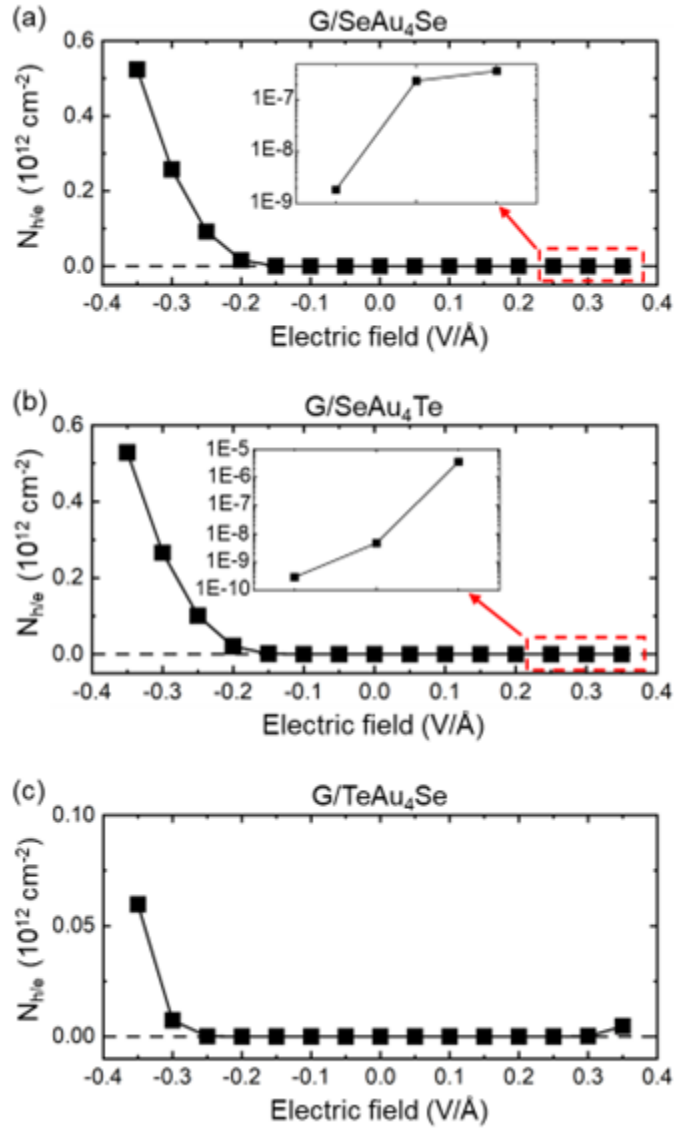

**Figure S14** Doping charge carrier concentrations of graphene in (a) G/SeAu<sub>4</sub>Se, (b) G/SeAu<sub>4</sub>Te and (c) G/TeAu<sub>4</sub>Se as a function of electric field from -0.35 to +0.35 V/Å. The hole (electron) doping charge carrier concentrations of graphene correspond to  $\Delta E_D > 0$  ( $\Delta E_D < 0$ ) in figure S13.

**Table S1** The structural parameters and dipole moments of SeAu<sub>4</sub>Se, TeAu<sub>4</sub>Te, SeAu<sub>4</sub>Te monolayers, respectively.

| Monolayer            | $a$ (Å) | $b$ (Å) | Dipole moments (Debye) |
|----------------------|---------|---------|------------------------|
| SeAu <sub>4</sub> Se | 7.54    | 5.25    | 0.00                   |
| TeAu <sub>4</sub> Te | 7.92    | 5.36    | 0.00                   |
| SeAu <sub>4</sub> Te | 7.72    | 5.31    | 0.22                   |
